# Supplementary material for: Coupled symmetric and asymmetric circuits underlying spatial orientation in fruit flies
Source: PubMed Central journal article supplement (PMC5529380; doi:10.1038/s41467-017-00191-6), 2017-07-26
Supplement: 41467_2017_191_MOESM1_ESM.pdf [file 41467_2017_191_MOESM1_ESM.pdf]

File Name: Supplementary Information  
Descriptions: Supplementary Tables

File Name: Peer Review File  
Descriptions:

17 Supplementary Table 1. The innervation table of EIP, PEI and PEN neuron classes

18

| Neuron class | Neuron type | PB -R8 | PB -R7 | PB -R6 | PB -R5 | PB -R4 | PB -R3 | PB -R2 | PB -R1 | PB -R0 | PB -L0 | PB -L1 | PB -L2 | PB -L3 | PB -L4 | PB -L5 | PB -L6 | PB -L7 | PB -L8 |
|--------------|-------------|--------|--------|--------|--------|--------|--------|--------|--------|--------|--------|--------|--------|--------|--------|--------|--------|--------|--------|
| EIP          | EIP0        | 2      |        |        |        |        |        |        |        |        |        |        |        |        |        |        |        |        |        |
| EIP          | EIP1        |        | 2      |        |        |        |        |        |        |        |        |        |        |        |        |        |        |        |        |
| EIP          | EIP2        |        |        | 2      |        |        |        |        |        |        |        |        |        |        |        |        |        |        |        |
| EIP          | EIP3        |        |        |        | 2      |        |        |        |        |        |        |        |        |        |        |        |        |        |        |
| EIP          | EIP4        |        |        |        |        | 2      |        |        |        |        |        |        |        |        |        |        |        |        |        |
| EIP          | EIP5        |        |        |        |        |        | 2      |        |        |        |        |        |        |        |        |        |        |        |        |
| EIP          | EIP6        |        |        |        |        |        |        | 2      |        |        |        |        |        |        |        |        |        |        |        |
| EIP          | EIP7        |        |        |        |        |        |        |        | 2      |        |        |        |        |        |        |        |        |        |        |
| EIP          | EIP8        |        |        |        |        |        |        |        |        | 2      |        |        |        |        |        |        |        |        |        |
| EIP          | EIP9        |        |        |        |        |        |        |        |        |        | 2      |        |        |        |        |        |        |        |        |
| EIP          | EIP10       |        |        |        |        |        |        |        |        |        |        | 2      |        |        |        |        |        |        |        |
| EIP          | EIP11       |        |        |        |        |        |        |        |        |        |        |        | 2      |        |        |        |        |        |        |
| EIP          | EIP12       |        |        |        |        |        |        |        |        |        |        |        |        | 2      |        |        |        |        |        |
| EIP          | EIP13       |        |        |        |        |        |        |        |        |        |        |        |        |        | 2      |        |        |        |        |
| EIP          | EIP14       |        |        |        |        |        |        |        |        |        |        |        |        |        |        | 2      |        |        |        |
| EIP          | EIP15       |        |        |        |        |        |        |        |        |        |        |        |        |        |        |        | 2      |        |        |
| EIP          | EIP16       |        |        |        |        |        |        |        |        |        |        |        |        |        |        |        |        | 2      |        |
| EIP          | EIP17       |        |        |        |        |        |        |        |        |        |        |        |        |        |        |        |        |        | 2      |
| PEI          | PEI0        |        | 1      |        |        |        |        |        |        |        |        |        |        |        |        |        |        |        |        |
| PEI          | PEI1        |        |        | 1      |        |        |        |        |        |        |        |        |        |        |        |        |        |        |        |
| PEI          | PEI2        |        |        |        | 1      |        |        |        |        |        |        |        |        |        |        |        |        |        |        |
| PEI          | PEI3        |        |        |        |        | 1      |        |        |        |        |        |        |        |        |        |        |        |        |        |
| PEI          | PEI4        |        |        |        |        |        | 1      |        |        |        |        |        |        |        |        |        |        |        |        |
| PEI          | PEI5        |        |        |        |        |        |        | 1      |        |        |        |        |        |        |        |        |        |        |        |
| PEI          | PEI6        |        |        |        |        |        |        |        | 1      |        |        |        |        |        |        |        |        |        |        |
| PEI          | PEI7        |        |        |        |        |        |        |        |        | 1      |        |        |        |        |        |        |        |        |        |
| PEI          | PEI8        |        |        |        |        |        |        |        |        |        | 1      |        |        |        |        |        |        |        |        |
| PEI          | PEI9        |        |        |        |        |        |        |        |        |        |        | 1      |        |        |        |        |        |        |        |
| PEI          | PEI10       |        |        |        |        |        |        |        |        |        |        |        | 1      |        |        |        |        |        |        |
| PEI          | PEI11       |        |        |        |        |        |        |        |        |        |        |        |        | 1      |        |        |        |        |        |
| PEI          | PEI12       |        |        |        |        |        |        |        |        |        |        |        |        |        | 1      |        |        |        |        |
| PEI          | PEI13       |        |        |        |        |        |        |        |        |        |        |        |        |        |        | 1      |        |        |        |
| PEI          | PEI14       |        |        |        |        |        |        |        |        |        |        |        |        |        |        |        | 1      |        |        |
| PEI          | PEI15       |        |        |        |        |        |        |        |        |        |        |        |        |        |        |        |        | 1      |        |
| PEN          | PEN0        | 1      |        |        |        |        |        |        |        |        |        |        |        |        |        |        |        |        |        |
| PEN          | PEN1        |        | 1      |        |        |        |        |        |        |        |        |        |        |        |        |        |        |        |        |
| PEN          | PEN2        |        |        | 1      |        |        |        |        |        |        |        |        |        |        |        |        |        |        |        |
| PEN          | PEN3        |        |        |        | 1      |        |        |        |        |        |        |        |        |        |        |        |        |        |        |
| PEN          | PEN4        |        |        |        |        | 1      |        |        |        |        |        |        |        |        |        |        |        |        |        |
| PEN          | PEN5        |        |        |        |        |        | 1      |        |        |        |        |        |        |        |        |        |        |        |        |
| PEN          | PEN6        |        |        |        |        |        |        | 1      |        |        |        |        |        |        |        |        |        |        |        |
| PEN          | PEN7        |        |        |        |        |        |        |        | 1      |        |        |        |        |        |        |        |        |        |        |
| PEN          | PEN8        |        |        |        |        |        |        |        |        |        | 1      |        |        |        |        |        |        |        |        |
| PEN          | PEN9        |        |        |        |        |        |        |        |        |        |        | 1      |        |        |        |        |        |        |        |
| PEN          | PEN10       |        |        |        |        |        |        |        |        |        |        |        | 1      |        |        |        |        |        |        |
| PEN          | PEN11       |        |        |        |        |        |        |        |        |        |        |        |        | 1      |        |        |        |        |        |
| PEN          | PEN12       |        |        |        |        |        |        |        |        |        |        |        |        |        | 1      |        |        |        |        |
| PEN          | PEN13       |        |        |        |        |        |        |        |        |        |        |        |        |        |        | 1      |        |        |        |
| PEN          | PEN14       |        |        |        |        |        |        |        |        |        |        |        |        |        |        |        | 1      |        |        |
| PEN          | PEN15       |        |        |        |        |        |        |        |        |        |        |        |        |        |        |        |        | 1      |        |

19

20

21

| Neuron class | Neuron type | EB-R8C | EB-R7C | EB-R6C | EB-R5C | EB-R4C | EB-R3C | EB-R2C | EB-R1C | EB-L1C | EB-L2C | EB-L3C | EB-L4C | EB-L5C | EB-L6C | EB-L7C | EB-L8C |
|--------------|-------------|--------|--------|--------|--------|--------|--------|--------|--------|--------|--------|--------|--------|--------|--------|--------|--------|
| EIP          | EIP0        | 1      |        |        |        |        |        |        |        |        |        |        |        |        |        |        |        |
| EIP          | EIP1        | 1      | 1      | 1      |        |        |        |        |        |        |        |        |        |        |        |        |        |
| EIP          | EIP2        |        |        | 1      | 1      | 1      |        |        |        |        |        |        |        |        |        |        |        |
| EIP          | EIP3        |        |        |        |        | 1      | 1      | 1      |        |        |        |        |        |        |        |        |        |
| EIP          | EIP4        |        |        |        |        |        |        | 1      | 1      | 1      |        |        |        |        |        |        |        |
| EIP          | EIP5        |        |        |        |        |        |        |        |        | 1      | 1      | 1      |        |        |        |        |        |
| EIP          | EIP6        |        |        |        |        |        |        |        |        |        |        | 1      | 1      | 1      |        |        |        |
| EIP          | EIP7        |        |        |        |        |        |        |        |        |        |        |        |        | 1      | 1      | 1      |        |
| EIP          | EIP8        | 1      |        |        |        |        |        |        |        |        |        |        |        |        |        | 1      | 1      |
| EIP          | EIP9        | 1      | 1      |        |        |        |        |        |        |        |        |        |        |        |        |        | 1      |
| EIP          | EIP10       |        | 1      | 1      | 1      |        |        |        |        |        |        |        |        |        |        |        |        |
| EIP          | EIP11       |        |        |        | 1      | 1      | 1      |        |        |        |        |        |        |        |        |        |        |
| EIP          | EIP12       |        |        |        |        |        | 1      | 1      | 1      |        |        |        |        |        |        |        |        |
| EIP          | EIP13       |        |        |        |        |        |        |        | 1      | 1      | 1      |        |        |        |        |        |        |
| EIP          | EIP14       |        |        |        |        |        |        |        |        |        | 1      | 1      | 1      |        |        |        |        |
| EIP          | EIP15       |        |        |        |        |        |        |        |        |        |        |        | 1      | 1      | 1      |        |        |
| EIP          | EIP16       |        |        |        |        |        |        |        |        |        |        |        |        |        | 1      | 1      | 1      |
| EIP          | EIP17       |        |        |        |        |        |        |        |        |        |        |        |        |        |        |        | 1      |
| PEI          | PEI0        |        | 2      | 2      |        |        |        |        |        |        |        |        |        |        |        |        |        |
| PEI          | PEI1        |        |        |        | 2      | 2      |        |        |        |        |        |        |        |        |        |        |        |
| PEI          | PEI2        |        |        |        |        |        | 2      | 2      |        |        |        |        |        |        |        |        |        |
| PEI          | PEI3        |        |        |        |        |        |        |        | 2      | 2      |        |        |        |        |        |        |        |
| PEI          | PEI4        |        |        |        |        |        |        |        |        |        | 2      | 2      |        |        |        |        |        |
| PEI          | PEI5        |        |        |        |        |        |        |        |        |        |        |        | 2      | 2      |        |        |        |
| PEI          | PEI6        |        |        |        |        |        |        |        |        |        |        |        |        |        | 2      | 2      |        |
| PEI          | PEI7        | 2      |        |        |        |        |        |        |        |        |        |        |        |        |        |        | 2      |
| PEI          | PEI8        | 2      |        |        |        |        |        |        |        |        |        |        |        |        |        |        | 2      |
| PEI          | PEI9        |        | 2      | 2      |        |        |        |        |        |        |        |        |        |        |        |        |        |
| PEI          | PEI10       |        |        |        | 2      | 2      |        |        |        |        |        |        |        |        |        |        |        |
| PEI          | PEI11       |        |        |        |        |        | 2      | 2      |        |        |        |        |        |        |        |        |        |
| PEI          | PEI12       |        |        |        |        |        |        |        | 2      | 2      |        |        |        |        |        |        |        |
| PEI          | PEI13       |        |        |        |        |        |        |        |        |        | 2      | 2      |        |        |        |        |        |
| PEI          | PEI14       |        |        |        |        |        |        |        |        |        |        |        | 2      | 2      |        |        |        |
| PEI          | PEI15       |        |        |        |        |        |        |        |        |        |        |        |        |        | 2      | 2      |        |
| PEN          | PEN0        |        |        |        |        |        |        |        |        |        |        |        |        |        |        |        |        |
| PEN          | PEN1        |        |        |        |        |        |        |        |        |        |        |        |        |        |        |        |        |
| PEN          | PEN2        |        |        |        |        |        |        |        |        |        |        |        |        |        |        |        |        |
| PEN          | PEN3        |        |        |        |        |        |        |        |        |        |        |        |        |        |        |        |        |
| PEN          | PEN4        |        |        |        |        |        |        |        |        |        |        |        |        |        |        |        |        |
| PEN          | PEN5        |        |        |        |        |        |        |        |        |        |        |        |        |        |        |        |        |
| PEN          | PEN6        |        |        |        |        |        |        |        |        |        |        |        |        |        |        |        |        |
| PEN          | PEN7        |        |        |        |        |        |        |        |        |        |        |        |        |        |        |        |        |
| PEN          | PEN8        |        |        |        |        |        |        |        |        |        |        |        |        |        |        |        |        |
| PEN          | PEN9        |        |        |        |        |        |        |        |        |        |        |        |        |        |        |        |        |
| PEN          | PEN10       |        |        |        |        |        |        |        |        |        |        |        |        |        |        |        |        |
| PEN          | PEN11       |        |        |        |        |        |        |        |        |        |        |        |        |        |        |        |        |
| PEN          | PEN12       |        |        |        |        |        |        |        |        |        |        |        |        |        |        |        |        |
| PEN          | PEN13       |        |        |        |        |        |        |        |        |        |        |        |        |        |        |        |        |
| PEN          | PEN14       |        |        |        |        |        |        |        |        |        |        |        |        |        |        |        |        |
| PEN          | PEN15       |        |        |        |        |        |        |        |        |        |        |        |        |        |        |        |        |

22  
23  
24  
25  
26

| Neuron class | Neuron type | EB-R8P | EB-R7P | EB-R6P | EB-R5P | EB-R4P | EB-R3P | EB-R2P | EB-R1P | EB-L1P | EB-L2P | EB-L3P | EB-L4P | EB-L5P | EB-L6P | EB-L7P | EB-L8P |
|--------------|-------------|--------|--------|--------|--------|--------|--------|--------|--------|--------|--------|--------|--------|--------|--------|--------|--------|
| EIP          | EIP0        | 1      |        |        |        |        |        |        |        |        |        |        |        |        |        |        |        |
| EIP          | EIP1        | 1      | 1      | 1      |        |        |        |        |        |        |        |        |        |        |        |        |        |
| EIP          | EIP2        |        |        | 1      | 1      | 1      |        |        |        |        |        |        |        |        |        |        |        |
| EIP          | EIP3        |        |        |        |        | 1      | 1      | 1      |        |        |        |        |        |        |        |        |        |
| EIP          | EIP4        |        |        |        |        |        |        | 1      | 1      | 1      |        |        |        |        |        |        |        |
| EIP          | EIP5        |        |        |        |        |        |        |        |        | 1      | 1      | 1      |        |        |        |        |        |
| EIP          | EIP6        |        |        |        |        |        |        |        |        |        |        | 1      | 1      | 1      |        |        |        |
| EIP          | EIP7        |        |        |        |        |        |        |        |        |        |        |        |        | 1      | 1      | 1      |        |
| EIP          | EIP8        | 1      |        |        |        |        |        |        |        |        |        |        |        |        |        | 1      | 1      |
| EIP          | EIP9        | 1      | 1      |        |        |        |        |        |        |        |        |        |        |        |        |        | 1      |
| EIP          | EIP10       |        | 1      | 1      | 1      |        |        |        |        |        |        |        |        |        |        |        |        |
| EIP          | EIP11       |        |        |        | 1      | 1      | 1      |        |        |        |        |        |        |        |        |        |        |
| EIP          | EIP12       |        |        |        |        |        | 1      | 1      | 1      |        |        |        |        |        |        |        |        |
| EIP          | EIP13       |        |        |        |        |        |        |        | 1      | 1      | 1      |        |        |        |        |        |        |
| EIP          | EIP14       |        |        |        |        |        |        |        |        |        | 1      | 1      | 1      |        |        |        |        |
| EIP          | EIP15       |        |        |        |        |        |        |        |        |        |        |        | 1      | 1      | 1      |        |        |
| EIP          | EIP16       |        |        |        |        |        |        |        |        |        |        |        |        |        | 1      | 1      | 1      |
| EIP          | EIP17       |        |        |        |        |        |        |        |        |        |        |        |        |        |        |        | 1      |
| PEI          | PEI0        |        |        |        |        |        |        |        |        |        |        |        |        |        |        |        |        |
| PEI          | PEI1        |        |        |        |        |        |        |        |        |        |        |        |        |        |        |        |        |
| PEI          | PEI2        |        |        |        |        |        |        |        |        |        |        |        |        |        |        |        |        |
| PEI          | PEI3        |        |        |        |        |        |        |        |        |        |        |        |        |        |        |        |        |
| PEI          | PEI4        |        |        |        |        |        |        |        |        |        |        |        |        |        |        |        |        |
| PEI          | PEI5        |        |        |        |        |        |        |        |        |        |        |        |        |        |        |        |        |
| PEI          | PEI6        |        |        |        |        |        |        |        |        |        |        |        |        |        |        |        |        |
| PEI          | PEI7        |        |        |        |        |        |        |        |        |        |        |        |        |        |        |        |        |
| PEI          | PEI8        |        |        |        |        |        |        |        |        |        |        |        |        |        |        |        |        |
| PEI          | PEI9        |        |        |        |        |        |        |        |        |        |        |        |        |        |        |        |        |
| PEI          | PEI10       |        |        |        |        |        |        |        |        |        |        |        |        |        |        |        |        |
| PEI          | PEI11       |        |        |        |        |        |        |        |        |        |        |        |        |        |        |        |        |
| PEI          | PEI12       |        |        |        |        |        |        |        |        |        |        |        |        |        |        |        |        |
| PEI          | PEI13       |        |        |        |        |        |        |        |        |        |        |        |        |        |        |        |        |
| PEI          | PEI14       |        |        |        |        |        |        |        |        |        |        |        |        |        |        |        |        |
| PEI          | PEI15       |        |        |        |        |        |        |        |        |        |        |        |        |        |        |        |        |
| PEN          | PEN0        |        | 2      | 2      |        |        |        |        |        |        |        |        |        |        |        |        |        |
| PEN          | PEN1        |        |        |        | 2      | 2      |        |        |        |        |        |        |        |        |        |        |        |
| PEN          | PEN2        |        |        |        |        |        | 2      | 2      |        |        |        |        |        |        |        |        |        |
| PEN          | PEN3        |        |        |        |        |        |        |        | 2      | 2      |        |        |        |        |        |        |        |
| PEN          | PEN4        |        |        |        |        |        |        |        |        |        | 2      | 2      |        |        |        |        |        |
| PEN          | PEN5        |        |        |        |        |        |        |        |        |        |        |        | 2      | 2      |        |        |        |
| PEN          | PEN6        |        |        |        |        |        |        |        |        |        |        |        |        |        | 2      | 2      |        |
| PEN          | PEN7        | 2      |        |        |        |        |        |        |        |        |        |        |        |        |        |        | 2      |
| PEN          | PEN8        | 2      |        |        |        |        |        |        |        |        |        |        |        |        |        |        | 2      |
| PEN          | PEN9        |        | 2      | 2      |        |        |        |        |        |        |        |        |        |        |        |        |        |
| PEN          | PEN10       |        |        |        | 2      | 2      |        |        |        |        |        |        |        |        |        |        |        |
| PEN          | PEN11       |        |        |        |        |        | 2      | 2      |        |        |        |        |        |        |        |        |        |
| PEN          | PEN12       |        |        |        |        |        |        |        | 2      | 2      |        |        |        |        |        |        |        |
| PEN          | PEN13       |        |        |        |        |        |        |        |        |        | 2      | 2      |        |        |        |        |        |
| PEN          | PEN14       |        |        |        |        |        |        |        |        |        |        |        | 2      | 2      |        |        |        |
| PEN          | PEN15       |        |        |        |        |        |        |        |        |        |        |        |        |        | 2      | 2      |        |

27

28 The table is derived from Lin C.-Y. et al. Cell Rep. 3, 1739-1753 (2013) and Wolff, T., Iyer, N. A. & Rubin, G.  
 29 M. J. Comp. Neurol. 523, 997-1037 (2015).

30 1: Postsynaptic terminal

31 2: Presynaptic terminal

|        |       | Destination |     |     |     |     |     |     |     |     |     |     |     |     |     |     |     |     |     |
|--------|-------|-------------|-----|-----|-----|-----|-----|-----|-----|-----|-----|-----|-----|-----|-----|-----|-----|-----|-----|
|        |       | 0           | 1   | 2   | 3   | 4   | 5   | 6   | 7   | 8   | 9   | 10  | 11  | 12  | 13  | 14  | 15  | 16  | 17  |
| Source |       | EIP         | EIP | EIP | EIP | EIP | EIP | EIP | EIP | EIP | EIP | EIP | EIP | EIP | EIP | EIP | EIP | EIP | EIP |
|        |       | 0           | 1   | 2   | 3   | 4   | 5   | 6   | 7   | 8   | 9   | 10  | 11  | 12  | 13  | 14  | 15  | 16  | 17  |
| 0      | EIP0  |             |     |     |     |     |     |     |     |     |     |     |     |     |     |     |     |     |     |
| 1      | EIP1  |             |     |     |     |     |     |     |     |     |     |     |     |     |     |     |     |     |     |
| 2      | EIP2  |             |     |     |     |     |     |     |     |     |     |     |     |     |     |     |     |     |     |
| 3      | EIP3  |             |     |     |     |     |     |     |     |     |     |     |     |     |     |     |     |     |     |
| 4      | EIP4  |             |     |     |     |     |     |     |     |     |     |     |     |     |     |     |     |     |     |
| 5      | EIP5  |             |     |     |     |     |     |     |     |     |     |     |     |     |     |     |     |     |     |
| 6      | EIP6  |             |     |     |     |     |     |     |     |     |     |     |     |     |     |     |     |     |     |
| 7      | EIP7  |             |     |     |     |     |     |     |     |     |     |     |     |     |     |     |     |     |     |
| 8      | EIP8  |             |     |     |     |     |     |     |     |     |     |     |     |     |     |     |     |     |     |
| 9      | EIP9  |             |     |     |     |     |     |     |     |     |     |     |     |     |     |     |     |     |     |
| 10     | EIP10 |             |     |     |     |     |     |     |     |     |     |     |     |     |     |     |     |     |     |
| 11     | EIP11 |             |     |     |     |     |     |     |     |     |     |     |     |     |     |     |     |     |     |
| 12     | EIP12 |             |     |     |     |     |     |     |     |     |     |     |     |     |     |     |     |     |     |
| 13     | EIP13 |             |     |     |     |     |     |     |     |     |     |     |     |     |     |     |     |     |     |
| 14     | EIP14 |             |     |     |     |     |     |     |     |     |     |     |     |     |     |     |     |     |     |
| 15     | EIP15 |             |     |     |     |     |     |     |     |     |     |     |     |     |     |     |     |     |     |
| 16     | EIP16 |             |     |     |     |     |     |     |     |     |     |     |     |     |     |     |     |     |     |
| 17     | EIP17 |             |     |     |     |     |     |     |     |     |     |     |     |     |     |     |     |     |     |
| 18     | PEI0  |             | 1   | 1   |     |     |     |     |     |     | 1   | 1   |     |     |     |     |     |     |     |
| 19     | PEI1  |             |     | 1   | 1   |     |     |     |     |     |     | 1   | 1   |     |     |     |     |     |     |
| 20     | PEI2  |             |     |     | 1   | 1   |     |     |     |     |     |     | 1   | 1   |     |     |     |     |     |
| 21     | PEI3  |             |     |     |     | 1   | 1   |     |     |     |     |     |     | 1   | 1   |     |     |     |     |
| 22     | PEI4  |             |     |     |     |     | 1   | 1   |     |     |     |     |     |     | 1   | 1   |     |     |     |
| 23     | PEI5  |             |     |     |     |     |     | 1   | 1   |     |     |     |     |     |     | 1   | 1   |     |     |
| 24     | PEI6  |             |     |     |     |     |     |     | 1   | 1   |     |     |     |     |     |     | 1   | 1   |     |
| 25     | PEI7  | 1           | 1   |     |     |     |     |     |     | 1   | 1   |     |     |     |     |     |     | 1   | 1   |
| 26     | PEI8  | 1           | 1   |     |     |     |     |     |     |     | 1   | 1   |     |     |     |     |     | 1   | 1   |
| 27     | PEI9  |             | 1   | 1   |     |     |     |     |     |     | 1   | 1   |     |     |     |     |     |     |     |
| 28     | PEI10 |             |     | 1   | 1   |     |     |     |     |     |     | 1   | 1   |     |     |     |     |     |     |
| 29     | PEI11 |             |     |     | 1   | 1   |     |     |     |     |     |     | 1   | 1   |     |     |     |     |     |
| 30     | PEI12 |             |     |     |     | 1   | 1   |     |     |     |     |     |     | 1   | 1   |     |     |     |     |
| 31     | PEI13 |             |     |     |     |     | 1   | 1   |     |     |     |     |     |     | 1   | 1   |     |     |     |
| 32     | PEI14 |             |     |     |     |     |     | 1   | 1   |     |     |     |     |     |     | 1   | 1   |     |     |
| 33     | PEI15 |             |     |     |     |     |     |     | 1   | 1   |     |     |     |     |     |     | 1   | 1   |     |
| 34     | PEN0  |             | 1   | 1   |     |     |     |     |     |     | 1   | 1   |     |     |     |     |     |     |     |
| 35     | PEN1  |             |     | 1   | 1   |     |     |     |     |     |     | 1   | 1   |     |     |     |     |     |     |
| 36     | PEN2  |             |     |     | 1   | 1   |     |     |     |     |     |     | 1   | 1   |     |     |     |     |     |
| 37     | PEN3  |             |     |     |     | 1   | 1   |     |     |     |     |     |     | 1   | 1   |     |     |     |     |
| 38     | PEN4  |             |     |     |     |     | 1   | 1   |     |     |     |     |     |     | 1   | 1   |     |     |     |
| 39     | PEN5  |             |     |     |     |     |     | 1   | 1   |     |     |     |     |     |     | 1   | 1   |     |     |
| 40     | PEN6  |             |     |     |     |     |     |     | 1   | 1   |     |     |     |     |     |     | 1   | 1   |     |
| 41     | PEN7  | 1           | 1   |     |     |     |     |     |     | 1   | 1   |     |     |     |     |     |     | 1   | 1   |
| 42     | PEN8  | 1           | 1   |     |     |     |     |     |     |     | 1   | 1   |     |     |     |     |     | 1   | 1   |
| 43     | PEN9  |             | 1   | 1   |     |     |     |     |     |     | 1   | 1   |     |     |     |     |     |     |     |
| 44     | PEN10 |             |     | 1   | 1   |     |     |     |     |     |     | 1   | 1   |     |     |     |     |     |     |
| 45     | PEN11 |             |     |     | 1   | 1   |     |     |     |     |     |     | 1   | 1   |     |     |     |     |     |
| 46     | PEN12 |             |     |     |     | 1   | 1   |     |     |     |     |     |     | 1   | 1   |     |     |     |     |
| 47     | PEN13 |             |     |     |     |     | 1   | 1   |     |     |     |     |     |     | 1   | 1   |     |     |     |
| 48     | PEN14 |             |     |     |     |     |     | 1   | 1   |     |     |     |     |     |     | 1   | 1   |     |     |
| 49     | PEN15 |             |     |     |     |     |     |     | 1   | 1   |     |     |     |     |     |     | 1   | 1   |     |
| 50     | R_EIP | -1          | -1  | -1  | -1  | -1  | -1  | -1  | -1  | -1  | -1  | -1  | -1  | -1  | -1  | -1  | -1  | -1  | -1  |
| 51     | R_PEI |             |     |     |     |     |     |     |     |     |     |     |     |     |     |     |     |     |     |
| 52     | R_PEN |             |     |     |     |     |     |     |     |     |     |     |     |     |     |     |     |     |     |

|        |       | Destination |       |       |       |       |       |       |       |       |       |        |        |        |        |        |        |
|--------|-------|-------------|-------|-------|-------|-------|-------|-------|-------|-------|-------|--------|--------|--------|--------|--------|--------|
|        |       | 18          | 19    | 20    | 21    | 22    | 23    | 24    | 25    | 26    | 27    | 28     | 29     | 30     | 31     | 32     | 33     |
| Source |       | PEI 0       | PEI 1 | PEI 2 | PEI 3 | PEI 4 | PEI 5 | PEI 6 | PEI 7 | PEI 8 | PEI 9 | PEI 10 | PEI 11 | PEI 12 | PEI 13 | PEI 14 | PEI 15 |
| 0      | EIP0  |             |       |       |       |       |       |       |       |       |       |        |        |        |        |        |        |
| 1      | EIP1  | 1           |       |       |       |       |       |       |       |       |       |        |        |        |        |        |        |
| 2      | EIP2  |             | 1     |       |       |       |       |       |       |       |       |        |        |        |        |        |        |
| 3      | EIP3  |             |       | 1     |       |       |       |       |       |       |       |        |        |        |        |        |        |
| 4      | EIP4  |             |       |       | 1     |       |       |       |       |       |       |        |        |        |        |        |        |
| 5      | EIP5  |             |       |       |       | 1     |       |       |       |       |       |        |        |        |        |        |        |
| 6      | EIP6  |             |       |       |       |       | 1     |       |       |       |       |        |        |        |        |        |        |
| 7      | EIP7  |             |       |       |       |       |       | 1     |       |       |       |        |        |        |        |        |        |
| 8      | EIP8  |             |       |       |       |       |       |       | 1     |       |       |        |        |        |        |        |        |
| 9      | EIP9  |             |       |       |       |       |       |       |       | 1     |       |        |        |        |        |        |        |
| 10     | EIP10 |             |       |       |       |       |       |       |       |       | 1     |        |        |        |        |        |        |
| 11     | EIP11 |             |       |       |       |       |       |       |       |       |       | 1      |        |        |        |        |        |
| 12     | EIP12 |             |       |       |       |       |       |       |       |       |       |        | 1      |        |        |        |        |
| 13     | EIP13 |             |       |       |       |       |       |       |       |       |       |        |        | 1      |        |        |        |
| 14     | EIP14 |             |       |       |       |       |       |       |       |       |       |        |        |        | 1      |        |        |
| 15     | EIP15 |             |       |       |       |       |       |       |       |       |       |        |        |        |        | 1      |        |
| 16     | EIP16 |             |       |       |       |       |       |       |       |       |       |        |        |        |        |        | 1      |
| 17     | EIP17 |             |       |       |       |       |       |       |       |       |       |        |        |        |        |        |        |
| 18     | PEI0  |             |       |       |       |       |       |       |       |       |       |        |        |        |        |        |        |
| 19     | PEI1  |             |       |       |       |       |       |       |       |       |       |        |        |        |        |        |        |
| 20     | PEI2  |             |       |       |       |       |       |       |       |       |       |        |        |        |        |        |        |
| 21     | PEI3  |             |       |       |       |       |       |       |       |       |       |        |        |        |        |        |        |
| 22     | PEI4  |             |       |       |       |       |       |       |       |       |       |        |        |        |        |        |        |
| 23     | PEI5  |             |       |       |       |       |       |       |       |       |       |        |        |        |        |        |        |
| 24     | PEI6  |             |       |       |       |       |       |       |       |       |       |        |        |        |        |        |        |
| 25     | PEI7  |             |       |       |       |       |       |       |       |       |       |        |        |        |        |        |        |
| 26     | PEI8  |             |       |       |       |       |       |       |       |       |       |        |        |        |        |        |        |
| 27     | PEI9  |             |       |       |       |       |       |       |       |       |       |        |        |        |        |        |        |
| 28     | PEI10 |             |       |       |       |       |       |       |       |       |       |        |        |        |        |        |        |
| 29     | PEI11 |             |       |       |       |       |       |       |       |       |       |        |        |        |        |        |        |
| 30     | PEI12 |             |       |       |       |       |       |       |       |       |       |        |        |        |        |        |        |
| 31     | PEI13 |             |       |       |       |       |       |       |       |       |       |        |        |        |        |        |        |
| 32     | PEI14 |             |       |       |       |       |       |       |       |       |       |        |        |        |        |        |        |
| 33     | PEI15 |             |       |       |       |       |       |       |       |       |       |        |        |        |        |        |        |
| 34     | PEN0  |             |       |       |       |       |       |       |       |       |       |        |        |        |        |        |        |
| 35     | PEN1  |             |       |       |       |       |       |       |       |       |       |        |        |        |        |        |        |
| 36     | PEN2  |             |       |       |       |       |       |       |       |       |       |        |        |        |        |        |        |
| 37     | PEN3  |             |       |       |       |       |       |       |       |       |       |        |        |        |        |        |        |
| 38     | PEN4  |             |       |       |       |       |       |       |       |       |       |        |        |        |        |        |        |
| 39     | PEN5  |             |       |       |       |       |       |       |       |       |       |        |        |        |        |        |        |
| 40     | PEN6  |             |       |       |       |       |       |       |       |       |       |        |        |        |        |        |        |
| 41     | PEN7  |             |       |       |       |       |       |       |       |       |       |        |        |        |        |        |        |
| 42     | PEN8  |             |       |       |       |       |       |       |       |       |       |        |        |        |        |        |        |
| 43     | PEN9  |             |       |       |       |       |       |       |       |       |       |        |        |        |        |        |        |
| 44     | PEN10 |             |       |       |       |       |       |       |       |       |       |        |        |        |        |        |        |
| 45     | PEN11 |             |       |       |       |       |       |       |       |       |       |        |        |        |        |        |        |
| 46     | PEN12 |             |       |       |       |       |       |       |       |       |       |        |        |        |        |        |        |
| 47     | PEN13 |             |       |       |       |       |       |       |       |       |       |        |        |        |        |        |        |
| 48     | PEN14 |             |       |       |       |       |       |       |       |       |       |        |        |        |        |        |        |
| 49     | PEN15 |             |       |       |       |       |       |       |       |       |       |        |        |        |        |        |        |
| 50     | R_EIP |             |       |       |       |       |       |       |       |       |       |        |        |        |        |        |        |
| 51     | R_PEI | -1          | -1    | -1    | -1    | -1    | -1    | -1    | -1    | -1    | -1    | -1     | -1     | -1     | -1     | -1     | -1     |
| 52     | R_PEN |             |       |       |       |       |       |       |       |       |       |        |        |        |        |        |        |

|        |       | Destination |       |       |       |       |       |       |       |       |       |        |        |        |        |        |        |
|--------|-------|-------------|-------|-------|-------|-------|-------|-------|-------|-------|-------|--------|--------|--------|--------|--------|--------|
|        |       | 34          | 35    | 36    | 37    | 38    | 39    | 40    | 41    | 42    | 43    | 44     | 45     | 46     | 47     | 48     | 49     |
| Source |       | PEN 0       | PEN 1 | PEN 2 | PEN 3 | PEN 4 | PEN 5 | PEN 6 | PEN 7 | PEN 8 | PEN 9 | PEN 10 | PEN 11 | PEN 12 | PEN 13 | PEN 14 | PEN 15 |
| 0      | EIP0  | 1           |       |       |       |       |       |       |       |       |       |        |        |        |        |        |        |
| 1      | EIP1  |             | 1     |       |       |       |       |       |       |       |       |        |        |        |        |        |        |
| 2      | EIP2  |             |       | 1     |       |       |       |       |       |       |       |        |        |        |        |        |        |
| 3      | EIP3  |             |       |       | 1     |       |       |       |       |       |       |        |        |        |        |        |        |
| 4      | EIP4  |             |       |       |       | 1     |       |       |       |       |       |        |        |        |        |        |        |
| 5      | EIP5  |             |       |       |       |       | 1     |       |       |       |       |        |        |        |        |        |        |
| 6      | EIP6  |             |       |       |       |       |       | 1     |       |       |       |        |        |        |        |        |        |
| 7      | EIP7  |             |       |       |       |       |       |       | 1     |       |       |        |        |        |        |        |        |
| 8      | EIP8  |             |       |       |       |       |       |       |       |       |       |        |        |        |        |        |        |
| 9      | EIP9  |             |       |       |       |       |       |       |       |       |       |        |        |        |        |        |        |
| 10     | EIP10 |             |       |       |       |       |       |       |       | 1     |       |        |        |        |        |        |        |
| 11     | EIP11 |             |       |       |       |       |       |       |       |       | 1     |        |        |        |        |        |        |
| 12     | EIP12 |             |       |       |       |       |       |       |       |       |       | 1      |        |        |        |        |        |
| 13     | EIP13 |             |       |       |       |       |       |       |       |       |       |        | 1      |        |        |        |        |
| 14     | EIP14 |             |       |       |       |       |       |       |       |       |       |        |        | 1      |        |        |        |
| 15     | EIP15 |             |       |       |       |       |       |       |       |       |       |        |        |        | 1      |        |        |
| 16     | EIP16 |             |       |       |       |       |       |       |       |       |       |        |        |        |        | 1      |        |
| 17     | EIP17 |             |       |       |       |       |       |       |       |       |       |        |        |        |        |        | 1      |
| 18     | PEI0  |             |       |       |       |       |       |       |       |       |       |        |        |        |        |        |        |
| 19     | PEI1  |             |       |       |       |       |       |       |       |       |       |        |        |        |        |        |        |
| 20     | PEI2  |             |       |       |       |       |       |       |       |       |       |        |        |        |        |        |        |
| 21     | PEI3  |             |       |       |       |       |       |       |       |       |       |        |        |        |        |        |        |
| 22     | PEI4  |             |       |       |       |       |       |       |       |       |       |        |        |        |        |        |        |
| 23     | PEI5  |             |       |       |       |       |       |       |       |       |       |        |        |        |        |        |        |
| 24     | PEI6  |             |       |       |       |       |       |       |       |       |       |        |        |        |        |        |        |
| 25     | PEI7  |             |       |       |       |       |       |       |       |       |       |        |        |        |        |        |        |
| 26     | PEI8  |             |       |       |       |       |       |       |       |       |       |        |        |        |        |        |        |
| 27     | PEI9  |             |       |       |       |       |       |       |       |       |       |        |        |        |        |        |        |
| 28     | PEI10 |             |       |       |       |       |       |       |       |       |       |        |        |        |        |        |        |
| 29     | PEI11 |             |       |       |       |       |       |       |       |       |       |        |        |        |        |        |        |
| 30     | PEI12 |             |       |       |       |       |       |       |       |       |       |        |        |        |        |        |        |
| 31     | PEI13 |             |       |       |       |       |       |       |       |       |       |        |        |        |        |        |        |
| 32     | PEI14 |             |       |       |       |       |       |       |       |       |       |        |        |        |        |        |        |
| 33     | PEI15 |             |       |       |       |       |       |       |       |       |       |        |        |        |        |        |        |
| 34     | PEN0  |             |       |       |       |       |       |       |       |       |       |        |        |        |        |        |        |
| 35     | PEN1  |             |       |       |       |       |       |       |       |       |       |        |        |        |        |        |        |
| 36     | PEN2  |             |       |       |       |       |       |       |       |       |       |        |        |        |        |        |        |
| 37     | PEN3  |             |       |       |       |       |       |       |       |       |       |        |        |        |        |        |        |
| 38     | PEN4  |             |       |       |       |       |       |       |       |       |       |        |        |        |        |        |        |
| 39     | PEN5  |             |       |       |       |       |       |       |       |       |       |        |        |        |        |        |        |
| 40     | PEN6  |             |       |       |       |       |       |       |       |       |       |        |        |        |        |        |        |
| 41     | PEN7  |             |       |       |       |       |       |       |       |       |       |        |        |        |        |        |        |
| 42     | PEN8  |             |       |       |       |       |       |       |       |       |       |        |        |        |        |        |        |
| 43     | PEN9  |             |       |       |       |       |       |       |       |       |       |        |        |        |        |        |        |
| 44     | PEN10 |             |       |       |       |       |       |       |       |       |       |        |        |        |        |        |        |
| 45     | PEN11 |             |       |       |       |       |       |       |       |       |       |        |        |        |        |        |        |
| 46     | PEN12 |             |       |       |       |       |       |       |       |       |       |        |        |        |        |        |        |
| 47     | PEN13 |             |       |       |       |       |       |       |       |       |       |        |        |        |        |        |        |
| 48     | PEN14 |             |       |       |       |       |       |       |       |       |       |        |        |        |        |        |        |
| 49     | PEN15 |             |       |       |       |       |       |       |       |       |       |        |        |        |        |        |        |
| 50     | R_EIP |             |       |       |       |       |       |       |       |       |       |        |        |        |        |        |        |
| 51     | R_PEI |             |       |       |       |       |       |       |       |       |       |        |        |        |        |        |        |
| 52     | R_PEN | -1          | -1    | -1    | -1    | -1    | -1    | -1    | -1    | -1    | -1    | -1     | -1     | -1     | -1     | -1     | -1     |

|        |       | Destination |       |       |
|--------|-------|-------------|-------|-------|
|        |       | 50          | 51    | 52    |
| Source |       | R_EIP       | R_PEI | R_PEN |
| 0      | EIP0  | 1           |       |       |
| 1      | EIP1  | 1           |       |       |
| 2      | EIP2  | 1           |       |       |
| 3      | EIP3  | 1           |       |       |
| 4      | EIP4  | 1           |       |       |
| 5      | EIP5  | 1           |       |       |
| 6      | EIP6  | 1           |       |       |
| 7      | EIP7  | 1           |       |       |
| 8      | EIP8  | 1           |       |       |
| 9      | EIP9  | 1           |       |       |
| 10     | EIP10 | 1           |       |       |
| 11     | EIP11 | 1           |       |       |
| 12     | EIP12 | 1           |       |       |
| 13     | EIP13 | 1           |       |       |
| 14     | EIP14 | 1           |       |       |
| 15     | EIP15 | 1           |       |       |
| 16     | EIP16 | 1           |       |       |
| 17     | EIP17 | 1           |       |       |
| 18     | PEI0  |             |       |       |
| 19     | PEI1  |             |       |       |
| 20     | PEI2  |             |       |       |
| 21     | PEI3  |             |       |       |
| 22     | PEI4  |             |       |       |
| 23     | PEI5  |             |       |       |
| 24     | PEI6  |             |       |       |
| 25     | PEI7  |             |       |       |
| 26     | PEI8  |             |       |       |
| 27     | PEI9  |             |       |       |
| 28     | PEI10 |             |       |       |
| 29     | PEI11 |             |       |       |
| 30     | PEI12 |             |       |       |
| 31     | PEI13 |             |       |       |
| 32     | PEI14 |             |       |       |
| 33     | PEI15 |             |       |       |
| 34     | PEN0  |             |       |       |
| 35     | PEN1  |             |       |       |
| 36     | PEN2  |             |       |       |
| 37     | PEN3  |             |       |       |
| 38     | PEN4  |             |       |       |
| 39     | PEN5  |             |       |       |
| 40     | PEN6  |             |       |       |
| 41     | PEN7  |             |       |       |
| 42     | PEN8  |             |       |       |
| 43     | PEN9  |             |       |       |
| 44     | PEN10 |             |       |       |
| 45     | PEN11 |             |       |       |
| 46     | PEN12 |             |       |       |
| 47     | PEN13 |             |       |       |
| 48     | PEN14 |             |       |       |
| 49     | PEN15 |             |       |       |
| 50     | R_EIP | -1          |       |       |
| 51     | R_PEI |             |       |       |
| 52     | R_PEN |             |       |       |

42

43 1: excitatory (Glutamate: NMDA)

44 -1: inhibitory (GABA<sub>A</sub>)



45 Supplementary Table 3. Synaptic strength between neuron classes

46

| Source           | Destination |     |     |                  |
|------------------|-------------|-----|-----|------------------|
|                  | EIP         | PEI | PEN | R <sub>EIP</sub> |
| EIP              |             | 5   | 6   | 1                |
| PEI              | 4           |     |     |                  |
| PEN              | 6*          |     |     |                  |
| R <sub>EIP</sub> | 5           |     |     | 1.6              |
| R <sub>PEI</sub> |             | 10  |     |                  |
| R <sub>PEN</sub> |             |     | 10  |                  |

47

48 The numbers here indicate the maximum conductance of the synapses formed by the presynaptic neuron  
 49 class (source) and the postsynaptic neuron class (destination) in each single EB or PB region. If the  
 50 connection between two neurons covers two EB regions, the maximum conductance of this synaptic  
 51 connection is twice of the listed value.

52 \*: due to the atypical innervation patterns of EIP0 & EIP17, the synaptic strength between PEN neurons  
 53 and EIP0/EIP17 neurons are three times of the list value.

54

55

56

57

58

59

60

61

62

63

64

65

66

67

68

69

70

71

72

73

74

75

76

77

78

79

80

81

82

83

84

85

86

87

| LPU in right hemisphere | Connection strength (A) | LPU in left hemisphere | Connection strength (B) | Total strength A+B |
|-------------------------|-------------------------|------------------------|-------------------------|--------------------|
| CCP                     | 38.196                  | ccp                    | 56.152                  | 94.35              |
| DMP                     | 17.037                  | dmp                    | 28.103                  | 45.14              |
| VMP                     | 12.883                  | vmp                    | 21.177                  | 34.06              |
| SDFP                    | 0.000                   | sdfp                   | 23.130                  | 23.13              |
| CVLP                    | 11.068                  | cvlp                   | 11.378                  | 22.45              |
| MB                      | 2.449                   | mb                     | 18.000                  | 20.45              |
| AL                      | 11.529                  | al                     | 6.162                   | 17.69              |
| IDFP                    | 10.459                  | idfp                   | 1.414                   | 11.87              |
| CMP                     | 5.612                   | cmp                    | 3.162                   | 8.77               |
| DLP                     | 0.000                   | dlp                    | 7.313                   | 7.31               |
| SOG                     | 1.000                   | sog                    | 6.060                   | 7.06               |
| OPTU                    | 0.000                   | optu                   | 7.049                   | 7.05               |
| PAN                     | 0.000                   | pan                    | 4.449                   | 4.45               |
| AMMC                    | 1.414                   | ammc                   | 2.414                   | 3.83               |
| VLP-D                   | 0.000                   | vlp-d                  | 3.828                   | 3.83               |
| NOD                     | 2.449                   | nod                    | 0.000                   | 2.45               |
| SPP                     | 0.000                   | spp                    | 2.000                   | 2.00               |
| LH                      | 0.000                   | lh                     | 0.000                   | 0.00               |
| LOB                     | 0.000                   | lob                    | 0.000                   | 0.00               |
| LOP                     | 0.000                   | lop                    | 0.000                   | 0.00               |
| MED                     | 0.000                   | med                    | 0.000                   | 0.00               |
| OG                      | 0.000                   | og                     | 0.000                   | 0.00               |
| VLP-V                   | 0.000                   | vlp-v                  | 0.000                   | 0.00               |

90  
 91 \*Data are extracted and derived from Shih, C.-T. et al. Connectomics-Based Analysis of Information Flow in  
 92 the Drosophila Brain. *Curr. Biol.* 25, 1249–1258 (2015).  
 93  
 94  
 95  
 96  
 97  
 98  
 99  
 100  
 101  
 102  
 103  
 104  
 105  
 106  
 107  
 108  
 109  
 110

111

112 Supplementary Table 4b. Top ten strongest input connections\* to CCP (right hemisphere) and ccp (left  
113 hemisphere)

114

| LPU in right hemisphere | Connection strength (A) | LPU in left hemisphere | Connection strength (B) | Total strength A+B |
|-------------------------|-------------------------|------------------------|-------------------------|--------------------|
| CCP                     | 38.196                  | ccp                    | 56.152                  | 94.35              |
| DMP                     | 17.037                  | dmp                    | 28.103                  | 45.14              |
| VMP                     | 12.883                  | vmp                    | 21.177                  | 34.06              |
| SDFP                    | 0.000                   | sdfp                   | 23.130                  | 23.13              |
| CVLP                    | 11.068                  | cvlp                   | 11.378                  | 22.45              |
| MB                      | 2.449                   | mb                     | 18.000                  | 20.45              |
| AL                      | 11.529                  | al                     | 6.162                   | 17.69              |
| IDFP                    | 10.459                  | idfp                   | 1.414                   | 11.87              |
| CMP                     | 5.612                   | cmp                    | 3.162                   | 8.77               |
| DLP                     | 0.000                   | dlp                    | 7.313                   | 7.31               |
| SOG                     | 1.000                   | sog                    | 6.060                   | 7.06               |
| OPTU                    | 0.000                   | optu                   | 7.049                   | 7.05               |
| PAN                     | 0.000                   | pan                    | 4.449                   | 4.45               |
| AMMC                    | 1.414                   | ammc                   | 2.414                   | 3.83               |
| VLP-D                   | 0.000                   | vlp-d                  | 3.828                   | 3.83               |
| NOD                     | 2.449                   | nod                    | 0.000                   | 2.45               |
| SPP                     | 0.000                   | spp                    | 2.000                   | 2.00               |
| LH                      | 0.000                   | lh                     | 0.000                   | 0.00               |
| LOB                     | 0.000                   | lob                    | 0.000                   | 0.00               |
| LOP                     | 0.000                   | lop                    | 0.000                   | 0.00               |
| MED                     | 0.000                   | med                    | 0.000                   | 0.00               |
| OG                      | 0.000                   | og                     | 0.000                   | 0.00               |
| VLP-V                   | 0.000                   | vlp-v                  | 0.000                   | 0.00               |

115

116 \*Data are extracted and derived from Shih, C.-T. et al. Connectomics-Based Analysis of Information Flow in  
117 the Drosophila Brain. Curr. Biol. 25, 1249–1258 (2015).

118

119

120

121

122

123

124

125

126

127

128

129

130

131

132

133

134  
135  
136  
137  
138

Supplementary Table 4c. Top ten strongest input connections\* to VMP (right hemisphere) and vmp (left hemisphere)

| LPU in right hemisphere | Connection strength (A) | LPU in left hemisphere | Connection strength (B) | Total strength A+B |
|-------------------------|-------------------------|------------------------|-------------------------|--------------------|
| CCP                     | 38.196                  | ccp                    | 56.152                  | 94.35              |
| DMP                     | 17.037                  | dmp                    | 28.103                  | 45.14              |
| VMP                     | 12.883                  | vmp                    | 21.177                  | 34.06              |
| SDFP                    | 0.000                   | sdfp                   | 23.130                  | 23.13              |
| CVLP                    | 11.068                  | cvlp                   | 11.378                  | 22.45              |
| MB                      | 2.449                   | mb                     | 18.000                  | 20.45              |
| AL                      | 11.529                  | al                     | 6.162                   | 17.69              |
| IDFP                    | 10.459                  | idfp                   | 1.414                   | 11.87              |
| CMP                     | 5.612                   | cmp                    | 3.162                   | 8.77               |
| DLP                     | 0.000                   | dlp                    | 7.313                   | 7.31               |
| SOG                     | 1.000                   | sog                    | 6.060                   | 7.06               |
| OPTU                    | 0.000                   | optu                   | 7.049                   | 7.05               |
| PAN                     | 0.000                   | pan                    | 4.449                   | 4.45               |
| AMMC                    | 1.414                   | ammc                   | 2.414                   | 3.83               |
| VLP-D                   | 0.000                   | vlp-d                  | 3.828                   | 3.83               |
| NOD                     | 2.449                   | nod                    | 0.000                   | 2.45               |
| SPP                     | 0.000                   | spp                    | 2.000                   | 2.00               |
| LH                      | 0.000                   | lh                     | 0.000                   | 0.00               |
| LOB                     | 0.000                   | lob                    | 0.000                   | 0.00               |
| LOP                     | 0.000                   | lop                    | 0.000                   | 0.00               |
| MED                     | 0.000                   | med                    | 0.000                   | 0.00               |
| OG                      | 0.000                   | og                     | 0.000                   | 0.00               |
| VLP-V                   | 0.000                   | vlp-v                  | 0.000                   | 0.00               |

139  
140  
141  
142  
143  
144

\*Data are extracted and derived from Shih, C.-T. et al. Connectomics-Based Analysis of Information Flow in the *Drosophila* Brain. *Curr. Biol.* 25, 1249–1258 (2015).
